# Supplementary material for: The Effects of Dietary Silybin Supplementation on the Growth Performance and Regulation of Intestinal Oxidative Injury and Microflora Dysbiosis in Weaned Piglets
Source: MDPI journal article supplement (doi:10.3390/antiox12111975), 2023-11-07
Supplement: s1 [file s1]

## Supporting information

### The underlying raw images of Western blot

For ZO-1:

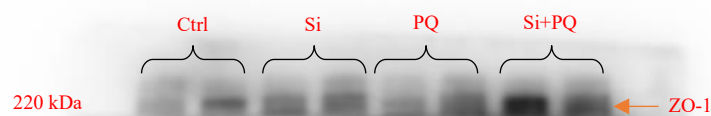

**Fig. 1** Raw image of ZO-1 expression determined by Western blot (Repeat 1 and Repeat 2). Ctrl, basal diet group treated with saline; Si, silybin diet group treated with saline; PQ, basal diet group treated with paraquat; Si + PQ, silybin diet group treated with paraquat.

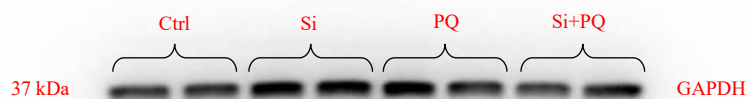

**Fig. 2** Raw image of GAPDH expression determined by Western blot (Repeat 1 and Repeat 2). Ctrl, basal diet group treated with saline; Si, silybin diet group treated with

saline; PQ, basal diet group treated with paraquat; Si + PQ, silybin diet group treated with paraquat.

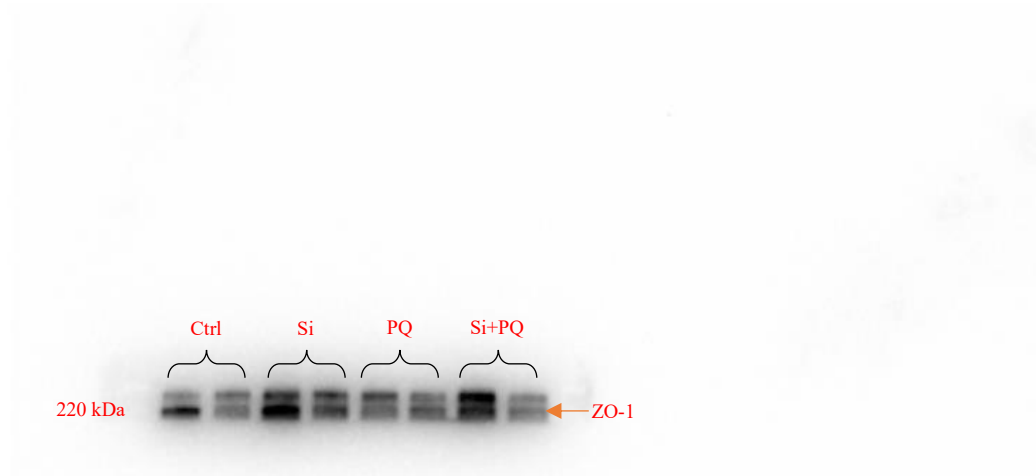

**Fig. 3** Raw image of ZO-1 expression determined by Western blot (Repeat 3 and Repeat 4). Ctrl, basal diet group treated with saline; Si, silybin diet group treated with saline; PQ, basal diet group treated with paraquat; Si + PQ, silybin diet group treated with paraquat.

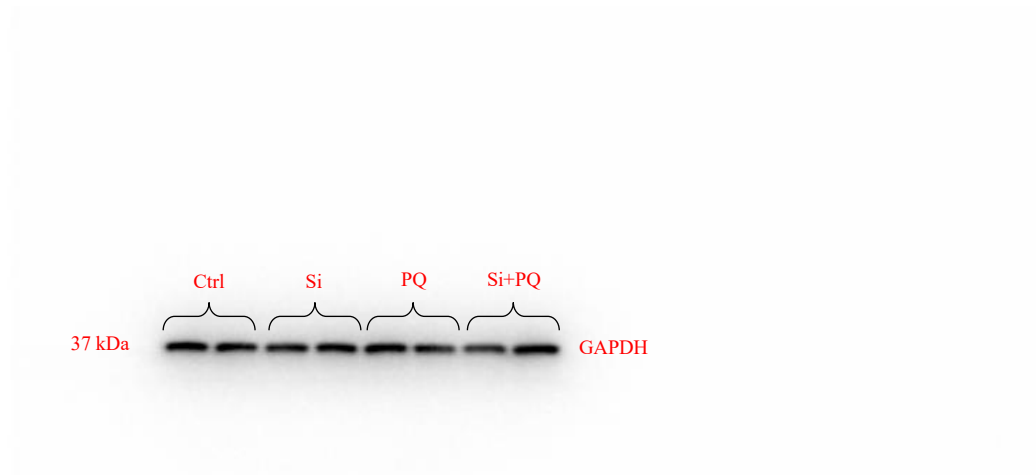

**Fig. 4** Raw image of GAPDH expression determined by Western blot (Repeat 3 and Repeat 4). Ctrl, basal diet group treated with saline; Si, silybin diet group treated with saline; PQ, basal diet group treated with paraquat; Si + PQ, silybin diet group treated with paraquat.

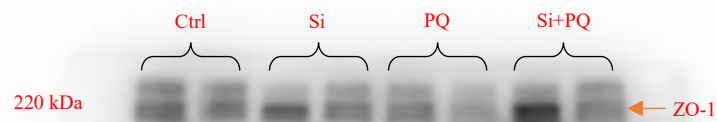

**Fig. 5** Raw image of ZO-1 expression determined by Western blot (Repeat 5 and Repeat 6). Ctrl, basal diet group treated with saline; Si, silybin diet group treated with saline; PQ, basal diet group treated with paraquat; Si + PQ, silybin diet group treated with paraquat.

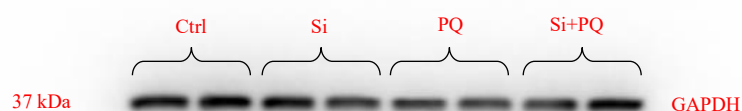

**Fig. 6** Raw image of GAPDH expression determined by Western blot (Repeat 5 and Repeat 6). Ctrl, basal diet group treated with saline; Si, silybin diet group treated with saline; PQ, basal diet group treated with paraquat; Si + PQ, silybin diet group treated with paraquat.

### For Occludin and Claudin 1:

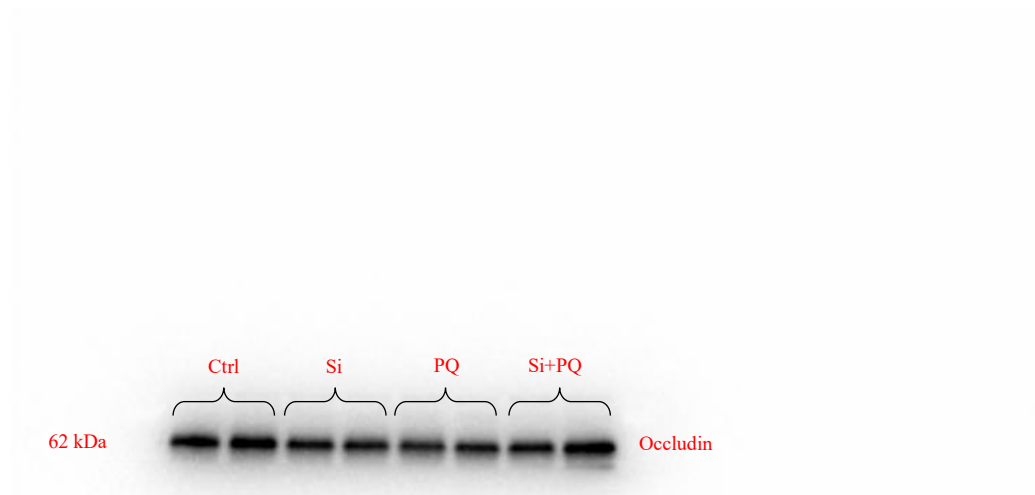

**Fig. 1** Raw image of Occludin expression determined by Western blot (Repeat 1 and Repeat 2). Ctrl, basal diet group treated with saline; Si, silybin diet group treated with saline; PQ, basal diet group treated with paraquat; Si + PQ, silybin diet group treated with paraquat.

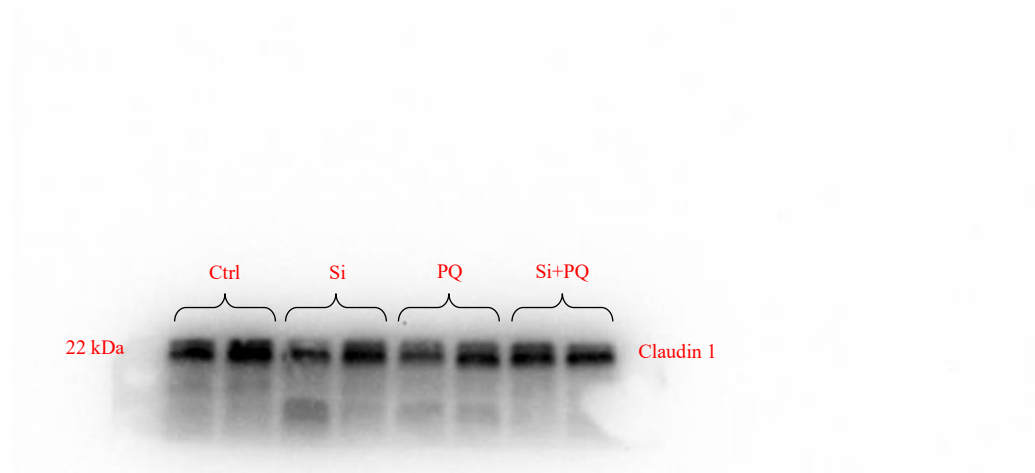

**Fig. 2** Raw image of Claudin 1 expression determined by Western blot (Repeat 1 and Repeat 2). Ctrl, basal diet group treated with saline; Si, silybin diet group treated with saline; PQ, basal diet group treated with paraquat; Si + PQ, silybin diet group treated with paraquat.

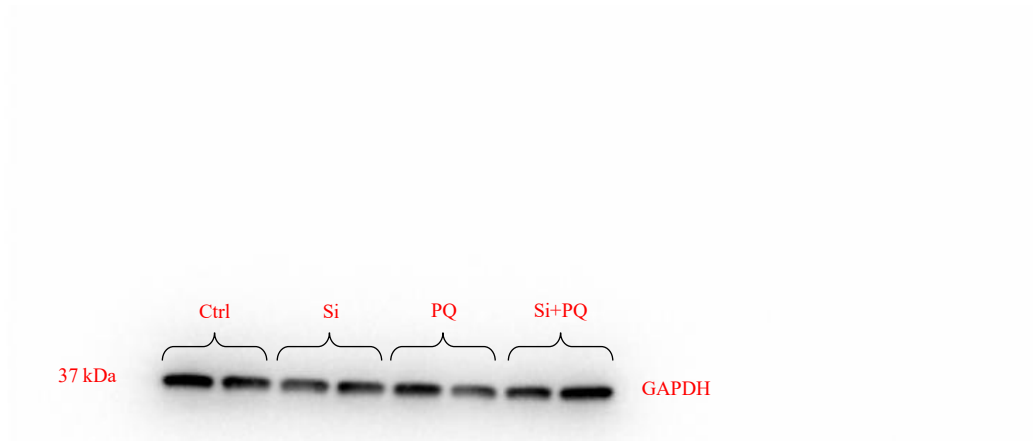

**Fig. 3** Raw image of GAPDH expression determined by Western blot (Repeat 1 and Repeat 2). Ctrl, basal diet group treated with saline; Si, silybin diet group treated with saline; PQ, basal diet group treated with paraquat; Si + PQ, silybin diet group treated with paraquat.

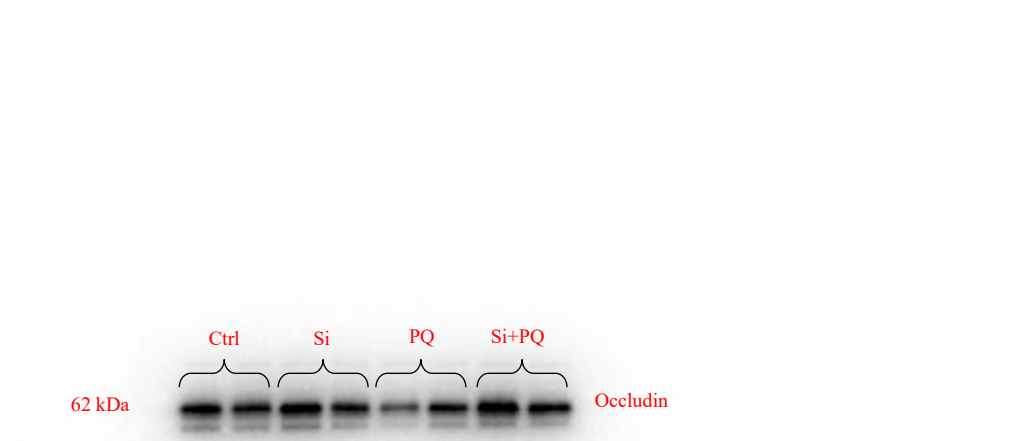

**Fig. 4** Raw image of Occludin expression determined by Western blot (Repeat 3 and Repeat 4). Ctrl, basal diet group treated with saline; Si, silybin diet group treated with saline; PQ, basal diet group treated with paraquat; Si + PQ, silybin diet group treated with paraquat.

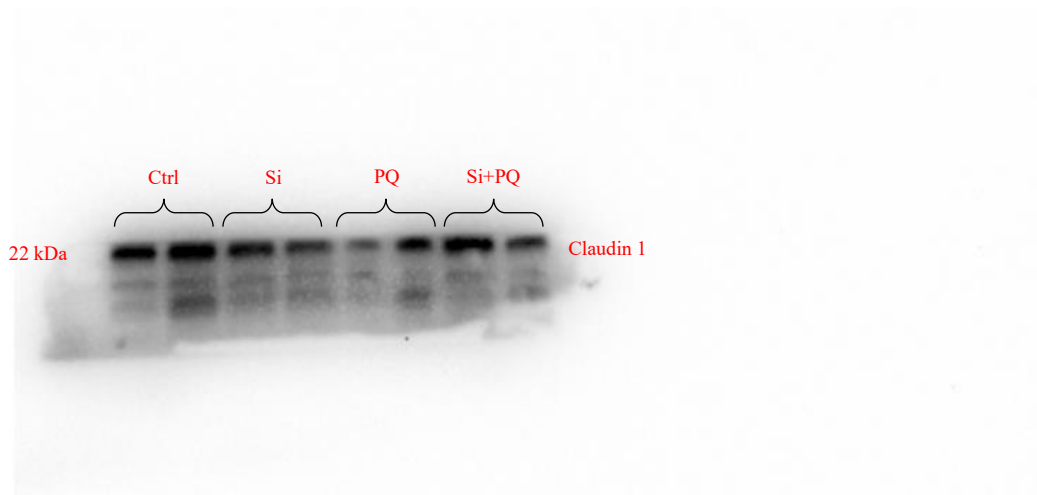

**Fig. 5.** Raw image of Claudin 1 expression determined by Western blot (Repeat 3 and Repeat 4). Ctrl, basal diet group treated with saline; Si, silybin diet group treated with saline; PQ, basal diet group treated with paraquat; Si + PQ, silybin diet group treated with paraquat.

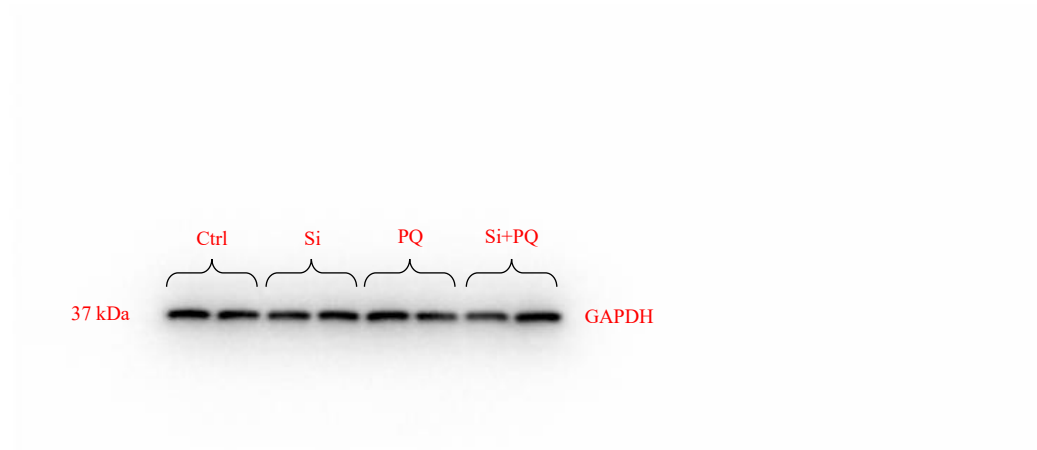

**Fig. 6** Raw image of GAPDH expression determined by Western blot (Repeat 3 and Repeat 4). Ctrl, basal diet group treated with saline; Si, silybin diet group treated with saline; PQ, basal diet group treated with paraquat; Si + PQ, silybin diet group treated with paraquat.

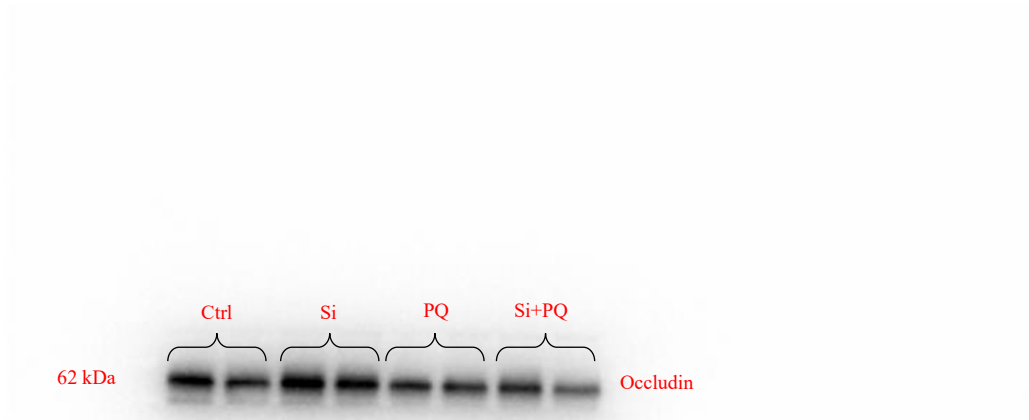

**Fig. 7** Raw image of Occludin expression determined by Western blot (Repeat 5 and Repeat 6). Ctrl, basal diet group treated with saline; Si, silybin diet group treated with saline; PQ, basal diet group treated with paraquat; Si + PQ, silybin diet group treated with paraquat.

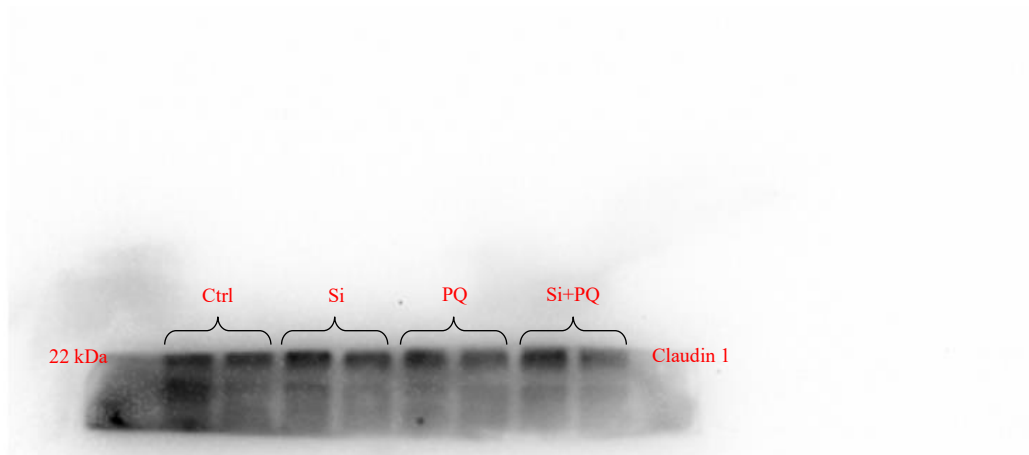

**Fig. 8** Raw image of Claudin 1 expression determined by Western blot (Repeat 5 and Repeat 6). Ctrl, basal diet group treated with saline; Si, silybin diet group treated with saline; PQ, basal diet group treated with paraquat; Si + PQ, silybin diet group treated with paraquat.

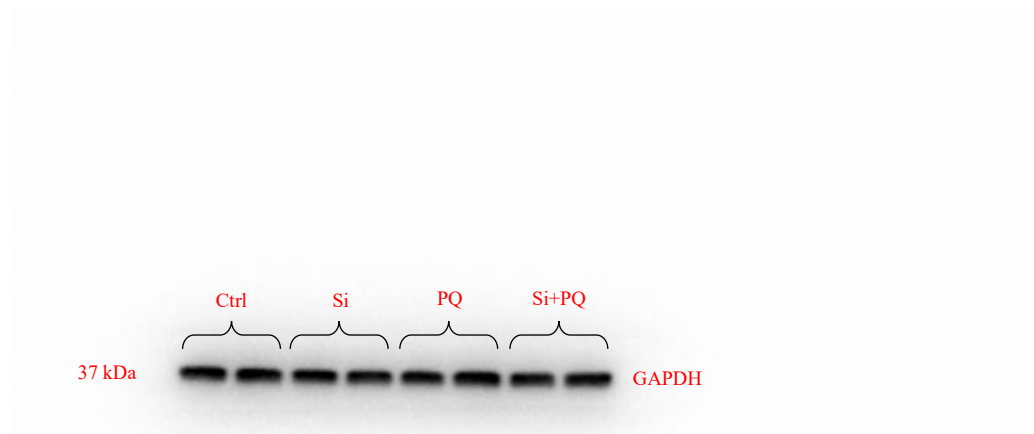

**Fig. 9** Raw image of GAPDH expression determined by Western blot (Repeat 5 and Repeat 6). Ctrl, basal diet group treated with saline; Si, silybin diet group treated with saline; PQ, basal diet group treated with paraquat; Si + PQ, silybin diet group treated with paraquat.



**For Cleaved caspase-3:**

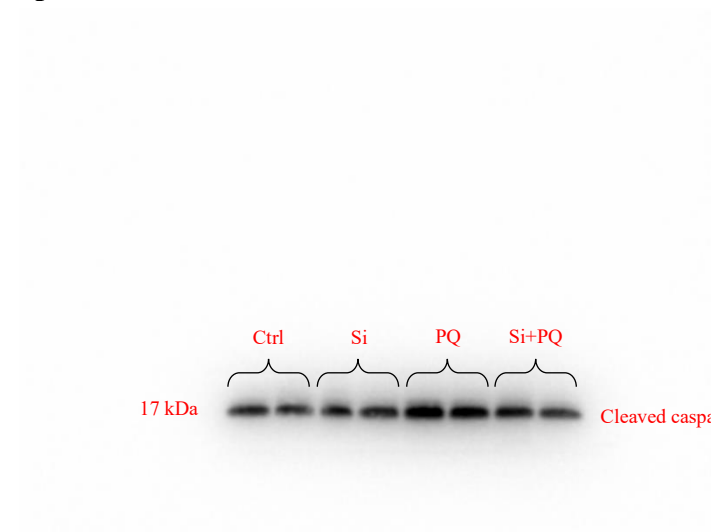

**Fig. 1** Raw image of Cleaved caspase-3 expression determined by Western blot (Repeat 1 and Repeat 2). Ctrl, basal diet group treated with saline; Si, silybin diet group treated with saline; PQ, basal diet group treated with paraquat; Si + PQ, silybin diet group treated with paraquat.

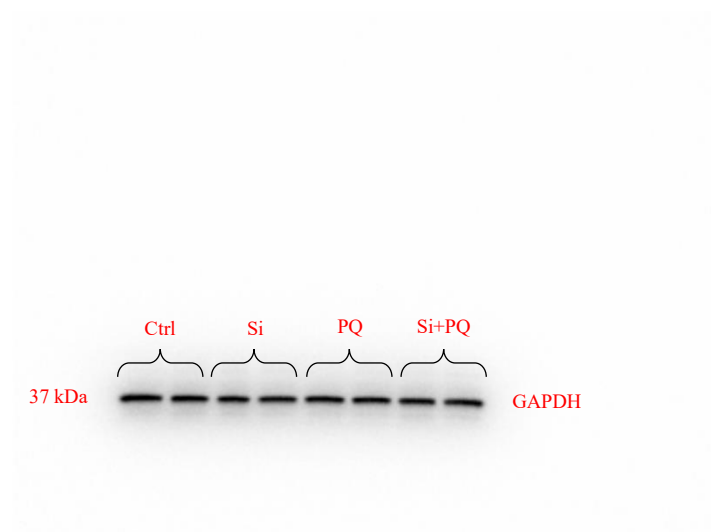

**Fig. 2** Raw image of GAPDH expression determined by Western blot (Repeat 1 and Repeat 2). Ctrl, basal diet group treated with saline; Si, silybin diet group treated with saline; PQ, basal diet group treated with paraquat; Si + PQ, silybin diet group treated with paraquat.

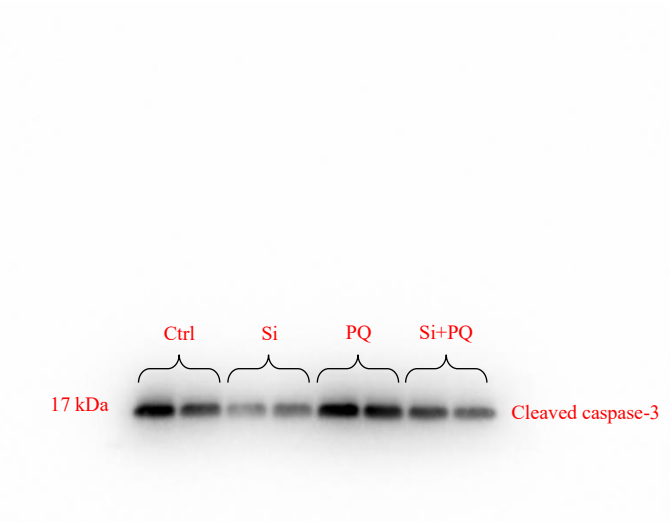

**Fig. 3** Raw image of Cleaved caspase-3 expression determined by Western blot (Repeat 3 and Repeat 4). Ctrl, basal diet group treated with saline; Si, silybin diet group treated with saline; PQ, basal diet group treated with paraquat; Si + PQ, silybin diet group treated with paraquat.

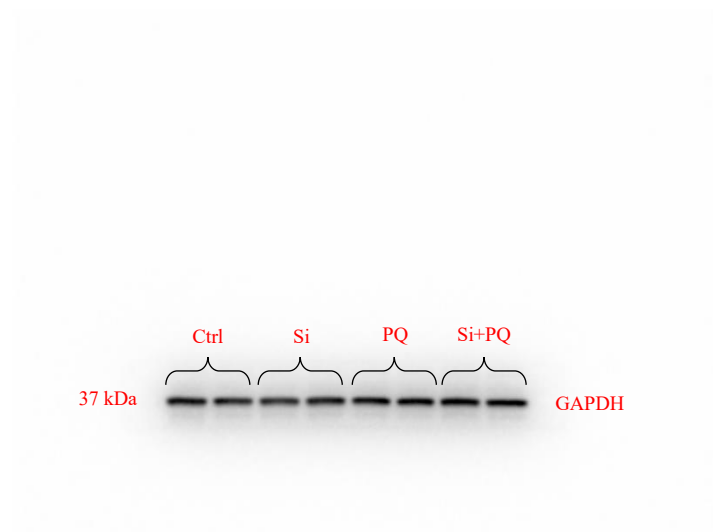

**Fig. 4** Raw image of GAPDH expression determined by Western blot (Repeat 3 and Repeat 4). Ctrl, basal diet group treated with saline; Si, silybin diet group treated with saline; PQ, basal diet group treated with paraquat; Si + PQ, silybin diet group treated with paraquat.

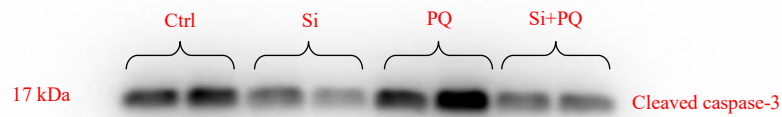

**Fig. 5** Raw image of Cleaved caspase-3 expression determined by Western blot (Repeat 5 and Repeat 6). Ctrl, basal diet group treated with saline; Si, silybin diet group treated with saline; PQ, basal diet group treated with paraquat; Si + PQ, silybin diet group treated with paraquat.

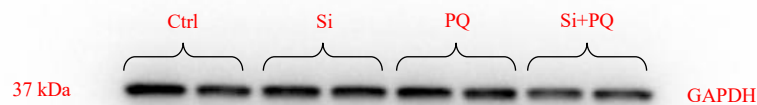

**Fig. 6** Raw image of GAPDH expression determined by Western blot (Repeat 5 and Repeat 6). Ctrl, basal diet group treated with saline; Si, silybin diet group treated with

saline; PQ, basal diet group treated with paraquat; Si + PQ, silybin diet group treated with paraquat.

**For Bcl-2 and Bax:**

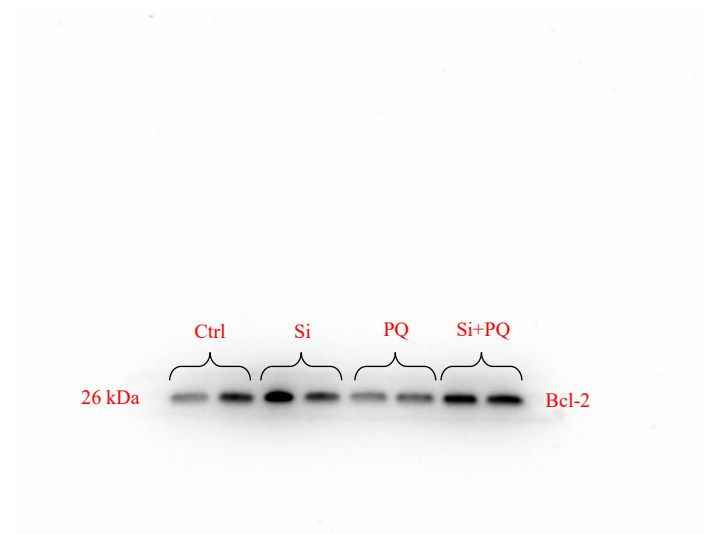

**Fig. 1** Raw image of Bcl-2 expression determined by Western blot (Repeat 1 and Repeat 2). Ctrl, basal diet group treated with saline; Si, silybin diet group treated with saline; PQ, basal diet group treated with paraquat; Si + PQ, silybin diet group treated with paraquat.

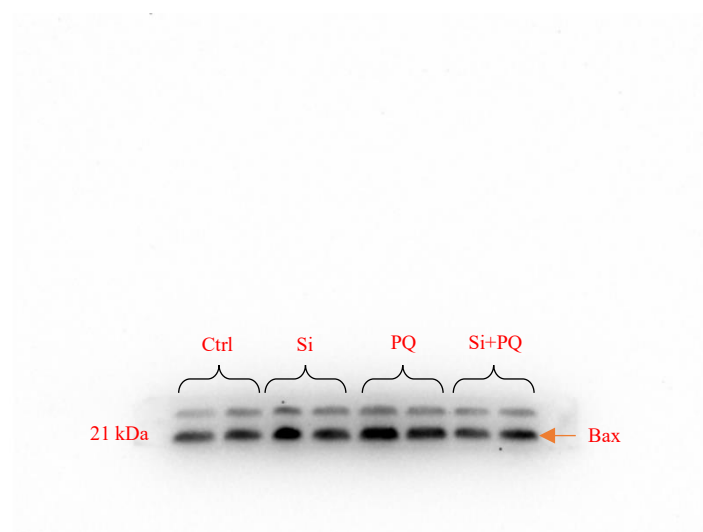

**Fig. 2** Raw image of Bax expression determined by Western blot (Repeat 1 and Repeat 2). Ctrl, basal diet group treated with saline; Si, silybin diet group treated with saline; PQ, basal diet group treated with paraquat; Si + PQ, silybin diet group treated with paraquat.

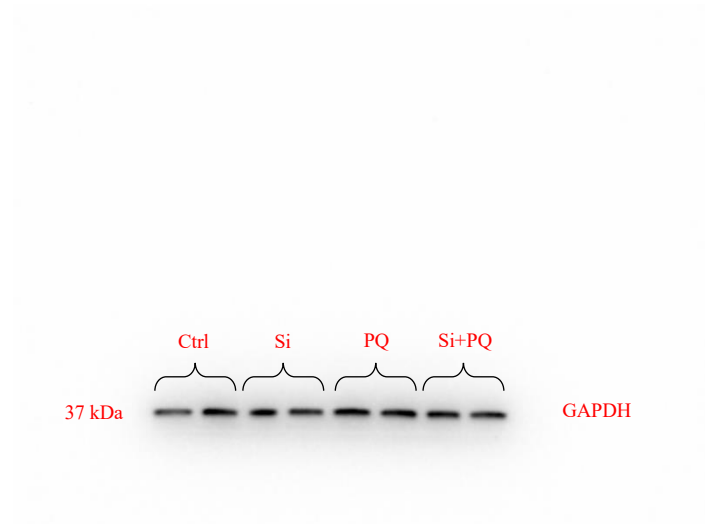

**Fig. 3** Raw image of GAPDH expression determined by Western blot (Repeat 1 and Repeat 2). Ctrl, basal diet group treated with saline; Si, silybin diet group treated with saline; PQ, basal diet group treated with paraquat; Si + PQ, silybin diet group treated with paraquat.

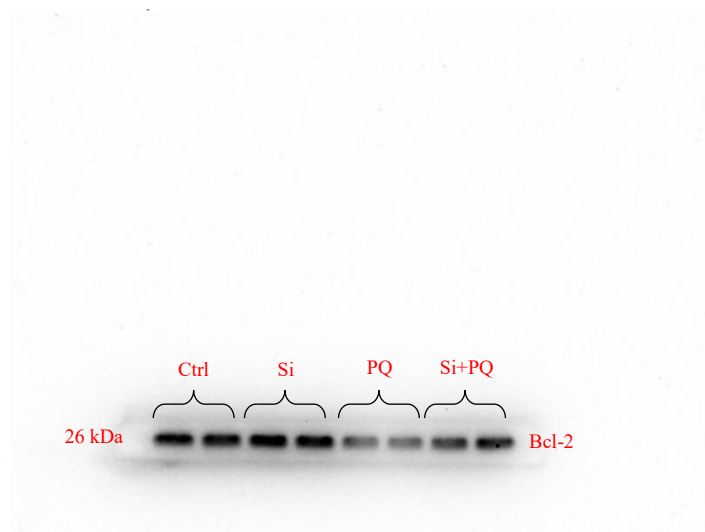

**Fig. 4** Raw image of Bcl-2 expression determined by Western blot (Repeat 3 and Repeat 4). Ctrl, basal diet group treated with saline; Si, silybin diet group treated with saline; PQ, basal diet group treated with paraquat; Si + PQ, silybin diet group treated with paraquat.

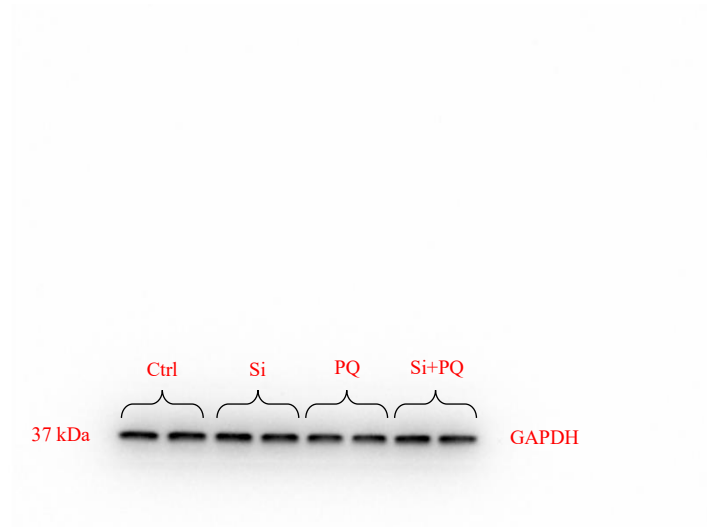

**Fig. 5** Raw image of GAPDH expression determined by Western blot (Repeat 3 and Repeat 4). Ctrl, basal diet group treated with saline; Si, silybin diet group treated with saline; PQ, basal diet group treated with paraquat; Si + PQ, silybin diet group treated with paraquat.

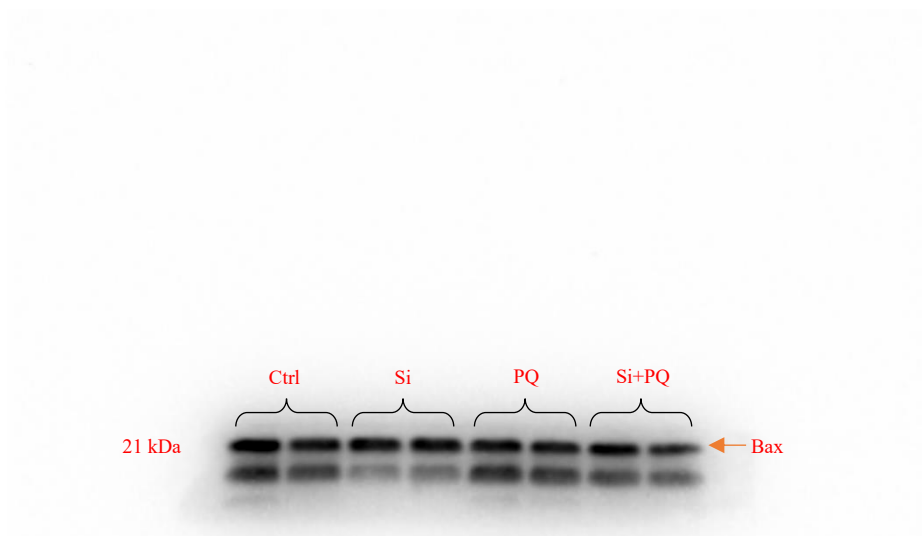

**Fig. 6** Raw image of Bax expression determined by Western blot (Repeat 3 and Repeat 4). Ctrl, basal diet group treated with saline; Si, silybin diet group treated with saline; PQ, basal diet group treated with paraquat; Si + PQ, silybin diet group treated with paraquat.

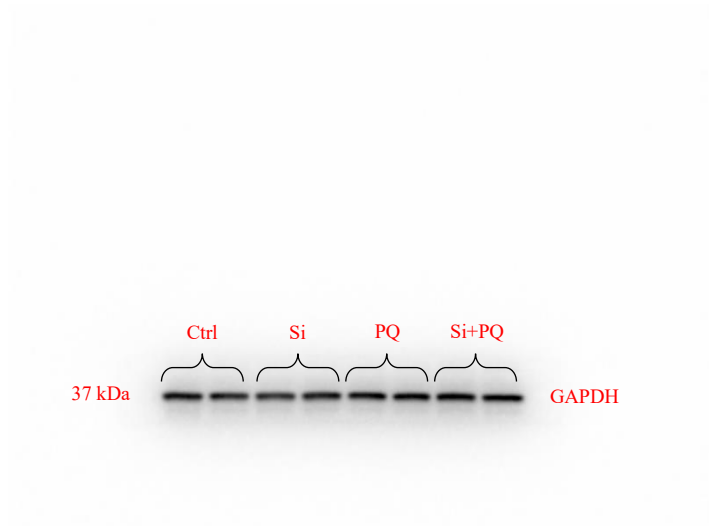

**Fig. 7** Raw image of GAPDH expression determined by Western blot (Repeat 3 and Repeat 4). Ctrl, basal diet group treated with saline; Si, silybin diet group treated with saline; PQ, basal diet group treated with paraquat; Si + PQ, silybin diet group treated with paraquat.

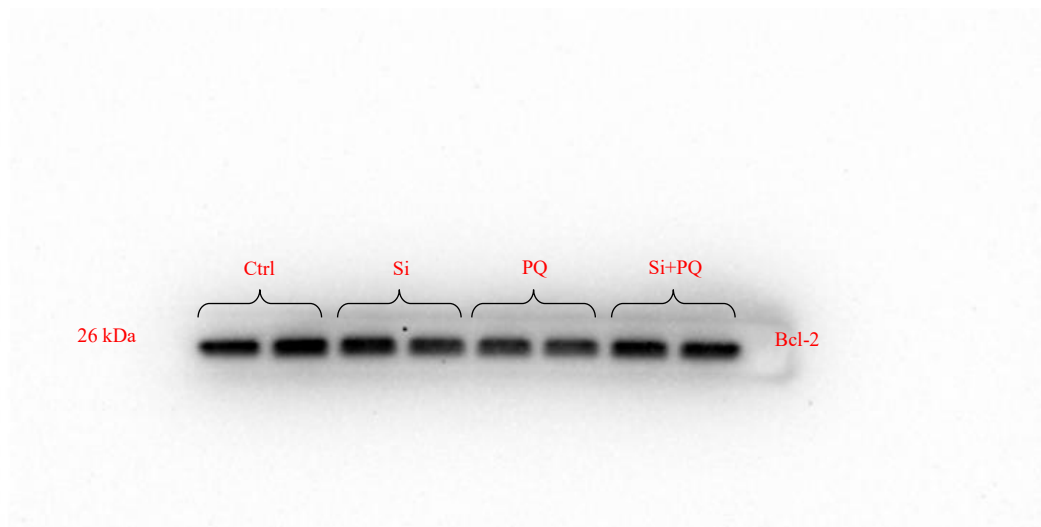

**Fig. 8** Raw image of Bcl-2 expression determined by Western blot (Repeat 5 and Repeat 6). Ctrl, basal diet group treated with saline; Si, silybin diet group treated with saline; PQ, basal diet group treated with paraquat; Si + PQ, silybin diet group treated with paraquat.



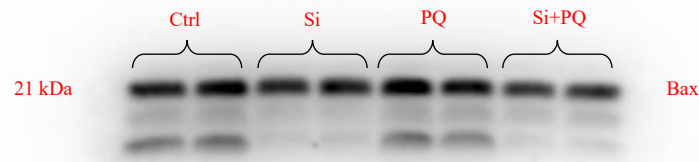

**Fig. 9** Raw image of Bax expression determined by Western blot (Repeat 5 and Repeat 6). Ctrl, basal diet group treated with saline; Si, silybin diet group treated with saline; PQ, basal diet group treated with paraquat; Si + PQ, silybin diet group treated with paraquat.

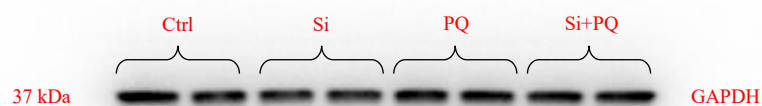

**Fig. 10** Raw image of GAPDH expression determined by Western blot (Repeat 5 and Repeat 6). Ctrl, basal diet group treated with saline; Si, silybin diet group treated with saline; PQ, basal diet group treated with paraquat; Si + PQ, silybin diet group treated with paraquat.
