# Supplementary material for: The Effects of Dietary Silybin Supplementation on the Growth Performance and Regulation of Intestinal Oxidative Injury and Microflora Dysbiosis in Weaned Piglets
Source: MDPI journal article supplement (doi:10.3390/antiox12111975), 2023-11-07
Supplement: s1 [file s1]

## Supporting information

**Table S1.** Ingredient and nutrient composition of the basal diet for trial 1 (as-fed basis)

|                                | Prestarter | Starter |
|--------------------------------|------------|---------|
| Ingredients, %                 |            |         |
| Corn                           | 16.44      | 21.81   |
| Extruded corn                  | 32.00      | 40.00   |
| Soybean meal                   | 14.00      | 17.50   |
| Extruded soybean               | 11.50      | 6.00    |
| Fish meal                      | 5.60       | 3.00    |
| Whey                           | 15.00      | 5.00    |
| Soybean oil                    | 1.00       | 1.20    |
| Bran                           | -          | 1.50    |
| Dicalcium phosphate            | 0.40       | 0.60    |
| Limestone (CaCO <sub>3</sub> ) | 0.75       | 0.94    |
| L-Lysine HCl                   | 1.20       | 1.05    |
| DL-Methionine                  | 0.09       | 0.07    |
| Threonine                      | 0.27       | 0.23    |
| Tryptophan                     | 0.02       | 0.01    |
| Salt                           | 0.40       | 0.40    |
| Choline chloride (60%)         | 0.05       | 0.05    |
| Premix <sup>1</sup>            | 1.08       | 0.64    |
| Zinc oxide                     | 0.20       | -       |
| Analyzed nutrient content      |            |         |
| Crude protein, %               | 19.02      | 17.55   |
| Dry matter, %                  | 91.67      | 91.12   |
| Calcium, %                     | 0.94       | 0.91    |
| Phosphorus, %                  | 0.61       | 0.57    |
| Calculated nutrient content    |            |         |
| ME <sup>2</sup> , Kcal/kg      | 3400       | 3350    |
| Crude protein, %               | 19.50      | 18.00   |
| Calcium, %                     | 0.80       | 0.70    |
| Phosphorus, %                  | 0.65       | 0.60    |
| Lysine, %                      | 1.30       | 1.15    |
| Methionine, %                  | 0.38       | 0.34    |
| Threonine, %                   | 0.76       | 0.68    |
| Tryptophan, %                  | 0.21       | 0.19    |

<sup>1</sup> Premix supplied per kilogram of diet: vitamin A, 35.2 mg; vitamin D<sub>3</sub>, 7.68 mg; vitamin E, 128 mg; vitamin K<sub>3</sub>, 8.16 mg; vitamin B<sub>1</sub>, 4 mg; vitamin B<sub>2</sub>, 12 mg; vitamin B<sub>6</sub>, 8.32 mg; vitamin B<sub>12</sub>, 4.8 mg; niacin, 38.4 mg; calcium pantothenate, 25 mg; folic acid, 1.68 mg; biotin, 0.16 mg; iron (FeSO<sub>4</sub> · H<sub>2</sub>O), 171 mg; manganese (MnSO<sub>4</sub> · H<sub>2</sub>O), 42.31 mg; copper (CuSO<sub>4</sub> · 5H<sub>2</sub>O), 125 mg; selenium (Na<sub>2</sub>SeO<sub>3</sub>), 0.19 mg; cobalt (CoCl<sub>2</sub>), 0.19 mg; iodine (Ca(IO<sub>3</sub>)<sub>2</sub>), 0.54 mg.

<sup>2</sup> ME = metabolizable energy.

**Table S2.** Ingredient and nutrient composition of the basal diet for trial 2 (as-fed basis)

| Ingredient                     | Content (%) | Nutrient levels           | Content |
|--------------------------------|-------------|---------------------------|---------|
| Corn                           | 19.04       | Analyzed nutrient level   |         |
| Extruded corn                  | 32.00       | Crude protein, %          | 19.00   |
| Soybean meal                   | 22.50       | Dry matter, %             | 91.70   |
| Fish meal                      | 5.60        | Calcium, %                | 0.94    |
| Whey                           | 15.00       | Phosphorus, %             | 0.61    |
| Soybean oil                    | 1.40        | Calculated nutrient level |         |
| Dicalcium phosphate            | 0.40        | ME <sup>2</sup> , Kcal/kg | 3400    |
| Limestone (CaCO <sub>3</sub> ) | 0.75        | Crude protein, %          | 19.50   |
| L-Lysine HCl                   | 1.20        | Calcium, %                | 0.8     |
| DL-Methionine                  | 0.09        | Phosphorus, %             | 0.65    |
| Threonine                      | 0.27        | Lysine, %                 | 1.30    |
| Tryptophan                     | 0.02        | Methionine, %             | 0.38    |
| NaCl                           | 0.40        | Threonine, %              | 0.76    |
| Choline chloride (60%)         | 0.05        | Tryptophan, %             | 0.21    |
| Premix <sup>1</sup>            | 1.08        |                           |         |
| Zinc oxide                     | 0.20        |                           |         |
| Total                          | 100         |                           |         |

<sup>1</sup> Premix supplied per kilogram of diet: vitamin A, 35.2 mg; vitamin D<sub>3</sub>, 7.68 mg; vitamin E, 128 mg; vitamin K<sub>3</sub>, 8.16 mg; vitamin B<sub>1</sub>, 4 mg; vitamin B<sub>2</sub>, 12 mg; vitamin B<sub>6</sub>, 8.32 mg; vitamin B<sub>12</sub>, 4.8 mg; niacin, 38.4 mg; calcium pantothenate, 25 mg; folic acid, 1.68 mg; biotin, 0.16 mg; iron (FeSO<sub>4</sub> · H<sub>2</sub>O), 171 mg; manganese (MnSO<sub>4</sub> · H<sub>2</sub>O), 42.31 mg; copper (CuSO<sub>4</sub> · 5H<sub>2</sub>O), 125 mg; selenium (Na<sub>2</sub>SeO<sub>3</sub>), 0.19 mg; cobalt (CoCl<sub>2</sub>), 0.19 mg; iodine (Ca(IO<sub>3</sub>)<sub>2</sub>), 0.54 mg.

<sup>2</sup> ME = metabolizable energy.

**Table S3.** The primers for quantitative real-time PCR

| Gene <sup>1</sup> | Accession number | Primer sequence (5'-3')                                  | Size (bp) |
|-------------------|------------------|----------------------------------------------------------|-----------|
| GAPDH             | NM_001206359.1   | F: GCTTGTCATCAATGGAAAGG<br>R: CATACGTAGCACCAGCATCA       | 86        |
| CAT               | NM_214301.2      | F: CCTGCAACGTTCTGTAAGGC<br>R: GCTTCATCTGGTCACTGGCT       | 72        |
| SOD1              | NM_001190422.1   | F: GAAGACAGTGTTAGTAACGG<br>R: CAGCCTTGTGTATTATCTCC       | 93        |
| SOD2              | NM_214127.2      | F: GCTGAAAAAGGGTGATGTTA<br>R: CTATGATTGATGTGGCCTCC       | 81        |
| GPX1              | NM_214201.1      | F: TCTCCAGTGTGTCGCAATGA<br>R: TCGATGGTCAGAAAGCGACG       | 104       |
| GPX2              | NM_001115136.1   | F: AGCCCCACTGTGAAATTCTT<br>R: CGTAGAAGGACTTGGCAATG       | 131       |
| GPX4              | NM_214407.1      | F: GATTCTGGCCTTCCCTTGC<br>R: TCCCCTTGGGCTGGACTTT         | 173       |
| Nrf2              | XM_005671981.3   | F: GACCTTGGAGTAAGTCGAGA<br>R: GGAGTTGTTCTTGTCTTTCC       | 103       |
| Keap1             | NM_001114671.1   | F: AGCTGGGATGCCTCAGTGTT<br>R: AGGCAAGTTCTCCCAGACATTC     | 100       |
| HO-1              | NM_001004027.1   | F: GAGAAGGCTTTAAGCTGGTG<br>R: GTTGTGCTCAATCTCCTCCT       | 74        |
| NQO1              | NM_001159613.1   | F: GGACATCACAGGTAAACTGA<br>R: TATAAGCCAGAGCAGTCTCG       | 68        |
| FIS1              | XM_021086263.1   | F: CCAAAGGGAGCAAAGAGGAGCA<br>R: CCTGGTTGTTCTGTGGCTCTGT   | 132       |
| DNM1              | XM_021069575.1   | F: GTAAACCGAAGCCAGAAGGACA<br>R: CAAGTGGCGATAGGAAGGGTGG   | 102       |
| MFN1              | NM_001315732.1   | F: CAATAGAAGAGAGGGAAGACC<br>R: TATTTGCCACCTCCTCTGTAA     | 117       |
| MFN2              | XM_021095370.1   | F: AGAGGAGAAGAGGAGCGTCAAGA<br>R: ACATCACACTCACCAGGCTGC   | 95        |
| OPA1              | XM_021070065.1   | F: CAGAGGATGGTGCTTGTTGAC<br>R: AGTATGATGGCGTTGGGATTC     | 128       |
| NDUFS2            | XM_005663166.3   | F: CTAAACGCGCAGAGATGAAGA<br>R: CCTCAATGGCAGTGTATGTGG     | 108       |
| NDUFV2            | NM_001097475.2   | F: CCCAGATACTCCATTTGATTTCA<br>R: AATTTCTGCCACCTTGTTTCATG | 169       |
| SDHA              | XM_021076930.1   | F: TCTCTGAGGCCGGGTTTAACACA<br>R: CACCTCCAGTTGTCCTCCTCCAT | 124       |
| UQCRB             | NM_001185172.1   | F: GGATGACGATGTAAAAGAAGCCA<br>R: TCCTCCTCATATTTTGTCCACTG | 141       |
| ATP5H             | XM_021066093.1   | F: CATTGACTGGGTAGCCTTTG<br>R: CTTCTCAGGTAGAGCAGCCA       | 115       |

---

<sup>1</sup> GAPDH = glyceraldehyde-3-phosphate dehydrogenase; CAT = catalase; SOD = superoxide dismutase; GPX = glutathione peroxidase; Nrf2 = nuclear factor-erythroid2-related factor 2; Keap1 = kelch-like ECH-associated protein 1; HO-1 = heme oxygenase-1; NQO1 = NAD(P)H: quinone oxidoreductase 1; FIS1 = fission; DNM1 = dynamin 1; MFN = mitofusin; OPA1 = mitochondrial dynamin-like GTPase; NDUFS2 = NADH ubiquinone oxidoreductase core subunit S2; NDUFV2 = NADH ubiquinone oxidoreductase core subunit V2; SDHA = succinate dehydrogenase complex flavoprotein subunit A; UQCRB = ubiquinol-cytochrome c reductase binding protein; ATP5H = ATP synthase subunit d; MUC2 = mucin 2.

**Table S4.** The list of antibodies used in western blotting.

| Antibody <sup>1</sup>                   | Dilution | Company              | Cat#     |
|-----------------------------------------|----------|----------------------|----------|
| Rabbit polyclonal anti-cleaved-caspase3 | 1:1000   | Affinity Biosciences | AF7022   |
| Rabbit polyclonal anti-Bax              | 1:1000   | Affinity Biosciences | AF0120   |
| Mouse monoclonal anti-Bcl-2             | 1:1000   | Abcam                | ab117115 |
| Rabbit polyclonal anti-ZO-1             | 1:1000   | Invitrogen           | 61-7300  |
| Rabbit polyclonal anti-Occludin         | 1:1000   | Abcam                | ab31721  |
| Rabbit polyclonal anti-Claudin1         | 1:1000   | Abcam                | ab129119 |
| Rabbit monoclonal anti-GAPDH            | 1:1000   | CST <sup>2</sup>     | 2118     |
| HRP-linked anti-mouse IgG               | 1:2000   | CST                  | 7076     |
| HRP-linked anti-rabbit IgG              | 1:2000   | CST                  | 7074     |

<sup>1</sup> ZO-1 = zonula occludens-1; GAPDH = glyceraldehyde-3-phosphate dehydrogenase.

<sup>2</sup> CST = Cell Signaling Technology.

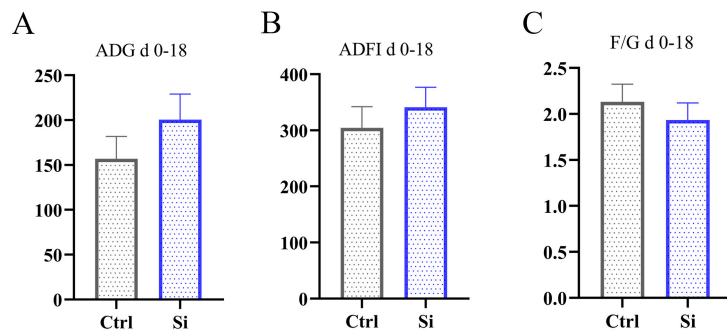

**Figure S1.** Effect of silybin on growth performance of piglets before the paraquat challenge. (A) ADG on days 0-18. (B) ADFI on days 0-18. (C) FCR on days 0-18. Data are expressed as mean  $\pm$  SE. \* $p < 0.05$ , \*\* $p < 0.01$ . Ctrl, basal diet group treated with saline; Si, silybin diet group treated with saline; ADG = average daily gain; ADFI = average daily feed intake; F/G = ADFI/ADG.

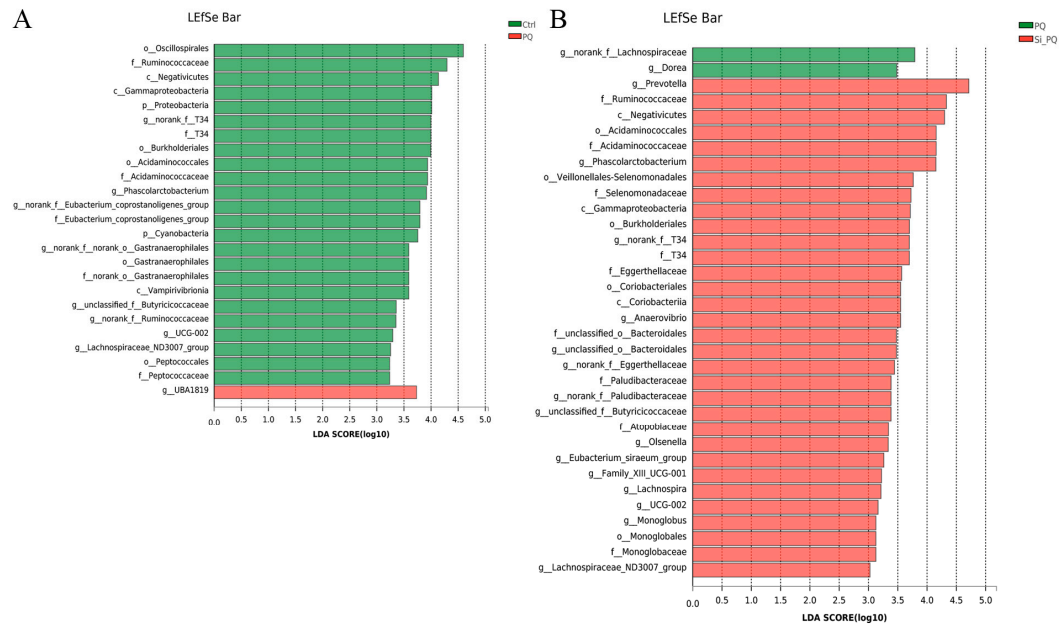

**Figure S2.** Histogram of linear discriminant analysis from genus to species level. (A) Ctrl vs. PQ. (B) PQ vs. Si + PQ. Ctrl, basal diet group treated with saline; Si, silybin diet group treated with saline; PQ, basal diet group treated with paraquat; Si + PQ, silybin diet group treated with paraquat; LefSe = Linear discriminant analysis effect size.
